# Supplementary material
Source: publisher site journal article supplement (https://www.dovepress.com/article/461701)
Supplement: Supplementary file 1 [file get_supplementary_file.php]

supplementary material

**Construction and application of PDL1-targeted multimodal theranostics Probe**

ChengXue He1,2#, YanHui Guo3#, Nina Zhou2#，Zhen Wang4#, Teli Liu2, Xiaoxia Xu2, Feng Wang2, Hua Zhu2, Zhi Yang1,2*, Xianteng Yang1,5*, Lei Xia2*

1 Guizhou University Medical College, Guiyang, GuiZhou Province 550025, China

2 Key Laboratory of Carcinogenesis and Translational Research (Ministry of Education/Beijing), NMPA Key Laboratory for Research and Evaluation of Radiopharmaceuticals (National Medical Products Administration), Department of Nuclear Medicine, Peking University Cancer Hospital & Institute, Beijing 100142, China

3 Department of Radiology, Peking University Third Hospital, Beijing 100088, China

4 Key Laboratory of Carcinogenesis and Translational Research (Ministry of Education, Beijing), Department of Hepato-Pancreato-Biliary Surgery, Sarcoma Center, Peking University Cancer Hospital and Institute, Beijing 100142, China

5 Department of Orthopedics, Guizhou Provincial People's Hospital 550025, China

#These authors contributed equally to this work

Correspondence: Lei Xia; Xianteng Yang; Zhi Yang

Key Laboratory of Carcinogenesis and Translational Research (Ministry of Education/Beijing), NMPA Key Laboratory for Research and Evaluation of Radiopharmaceuticals (National Medical Products Administration), Department of Nuclear Medicine, Peking University Cancer Hospital & Institute, Beijing 100142, China

Guizhou University Medical College, Guiyang, GuiZhou Province 550002, China

Department of Orthopedics, Guizhou Provincial People's Hospital 550025, China

Tel +86 010-88197852; 0851-85926691; +86 010-88196196

Email: xialei9012288@126.com; yangxian.teng@163.com; pekyz@163.com


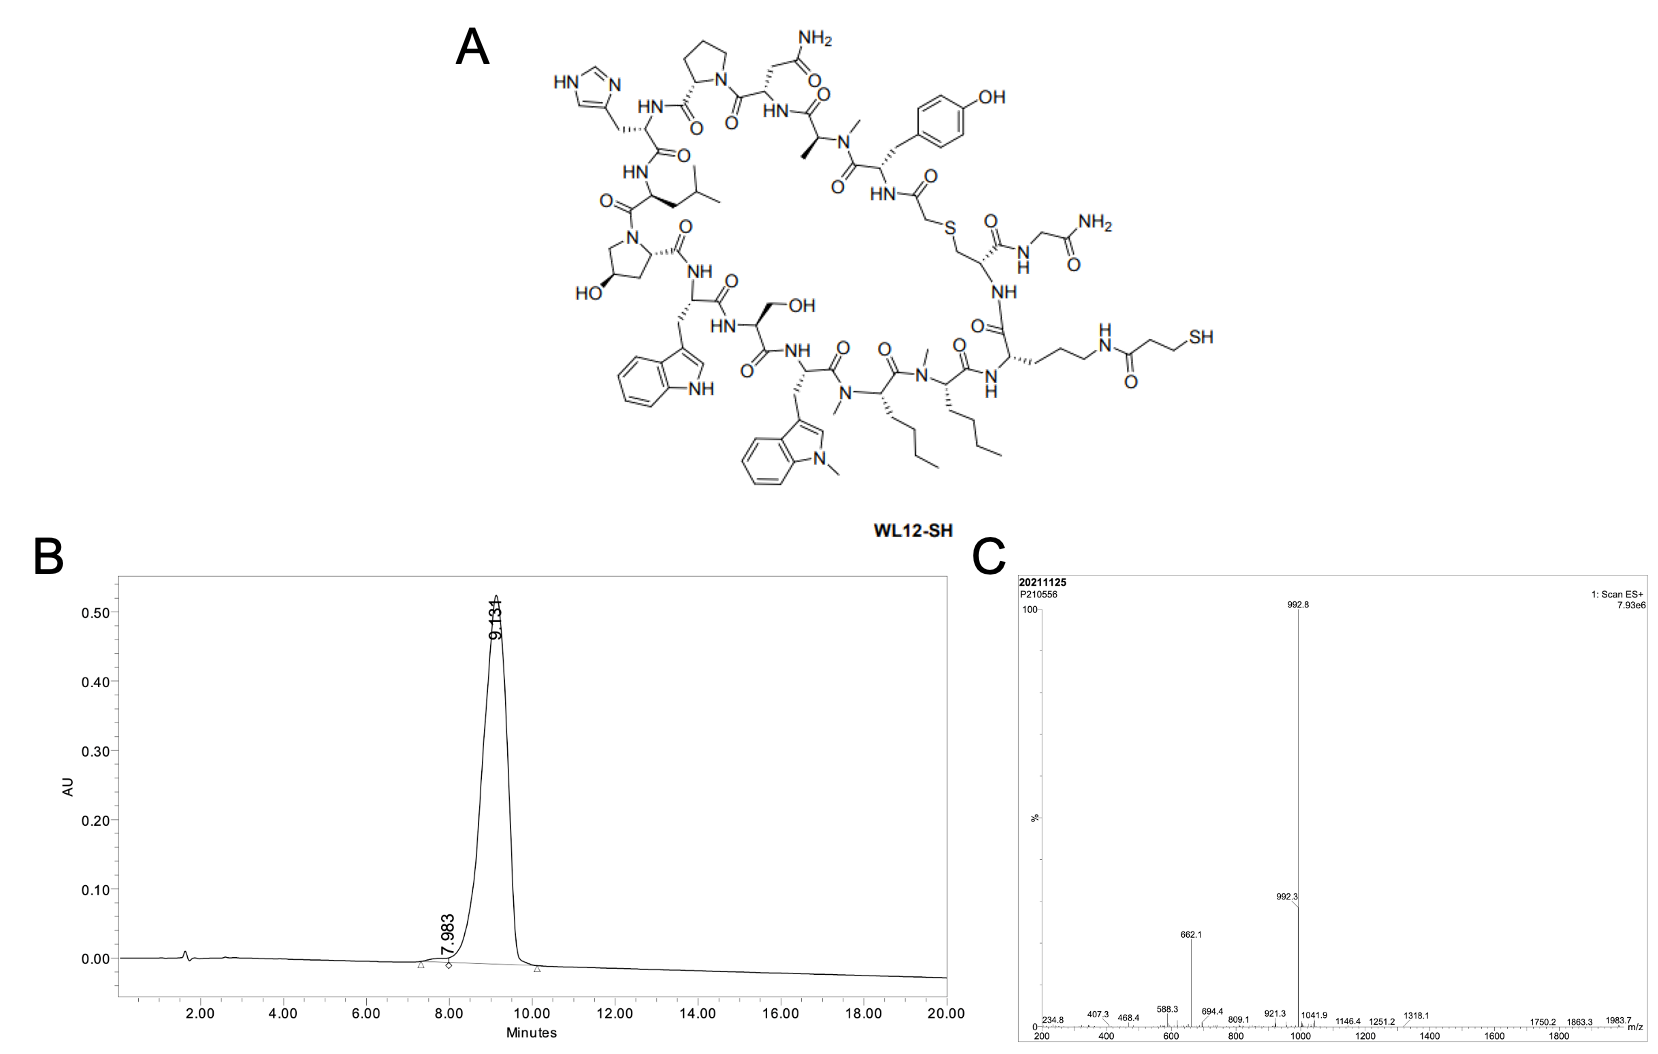


**Figure S1**. A) The characterization of WL12-SH. B) The HPLC analysis of WL12-SH in water. C) The ESI-MS of WL12-SH.

**Figure S2.** Synthetic route of WPMNs

**Figure S3.** Synthetic route of (131I/89Zr, Mn)-WPMNs

**Figure S4**. Radio-TLC result of the (89Zr, Mn)-WPMNs before purifying


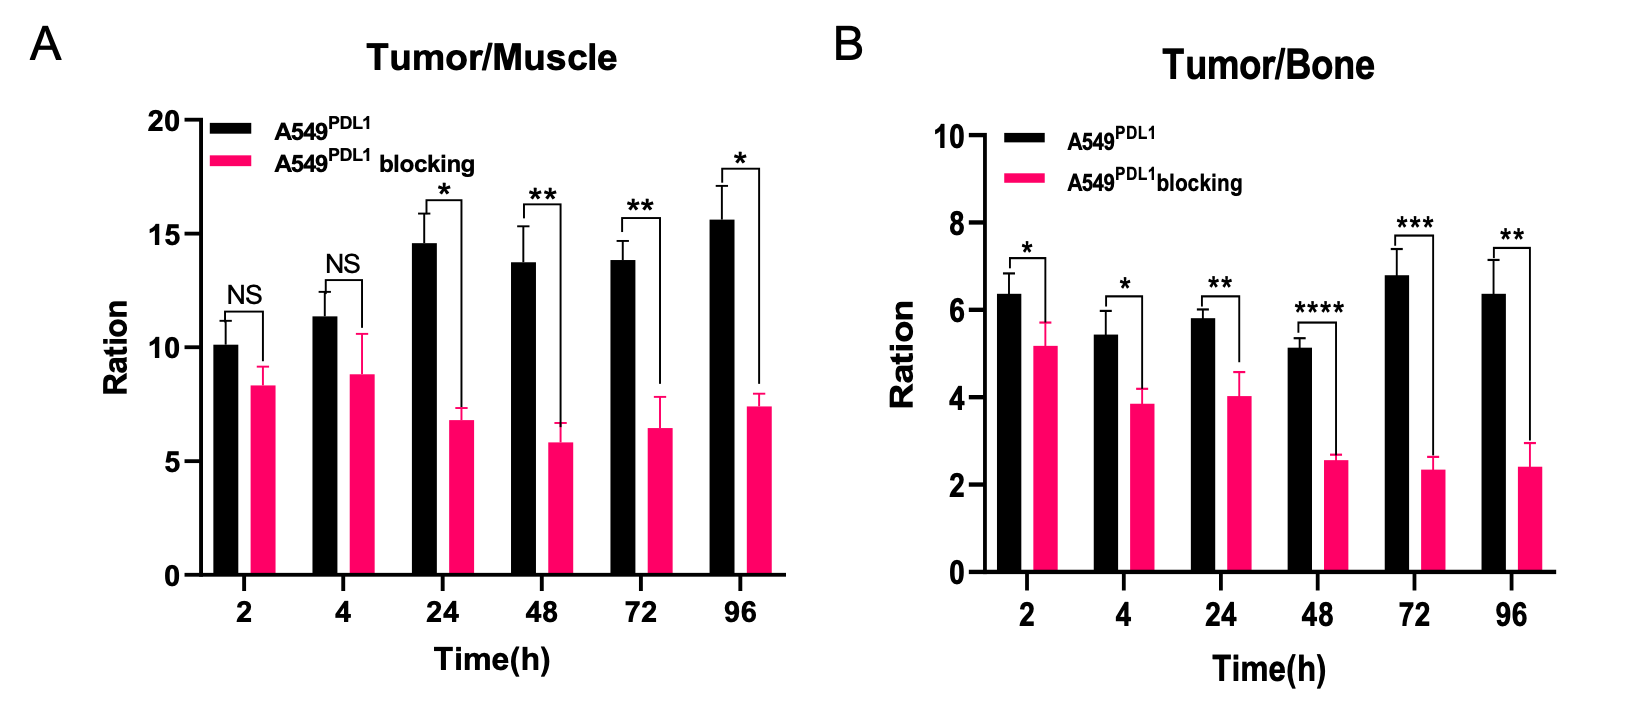


**Figure S5.** Plotting and calculating the SUVmax in important organs imaged by micro-PET/CT of ROI. A) The ration of tumor-to-muscle. B) The ration of the tumor-to-bone.


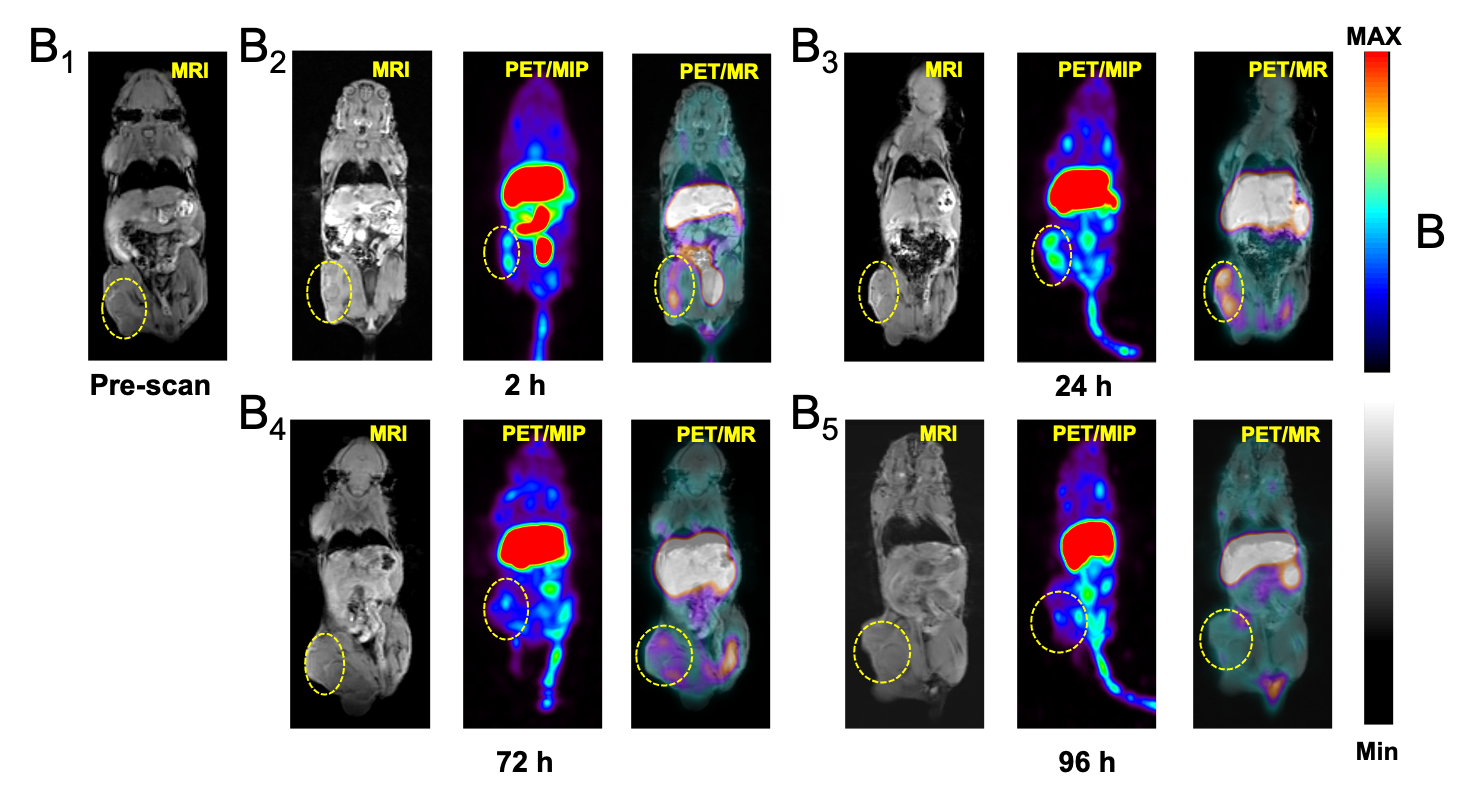


**Figure S6.** (B1-B5) T1-weighted MR axial images of A549PDL1 model at 2, 24, and 72 h and 96 h post-injection (89Zr, Mn)-WPMNs and blocking by 2.5mg/kg of Mn-WPMNs. (tumor site enveloped by a yellow dotted line).


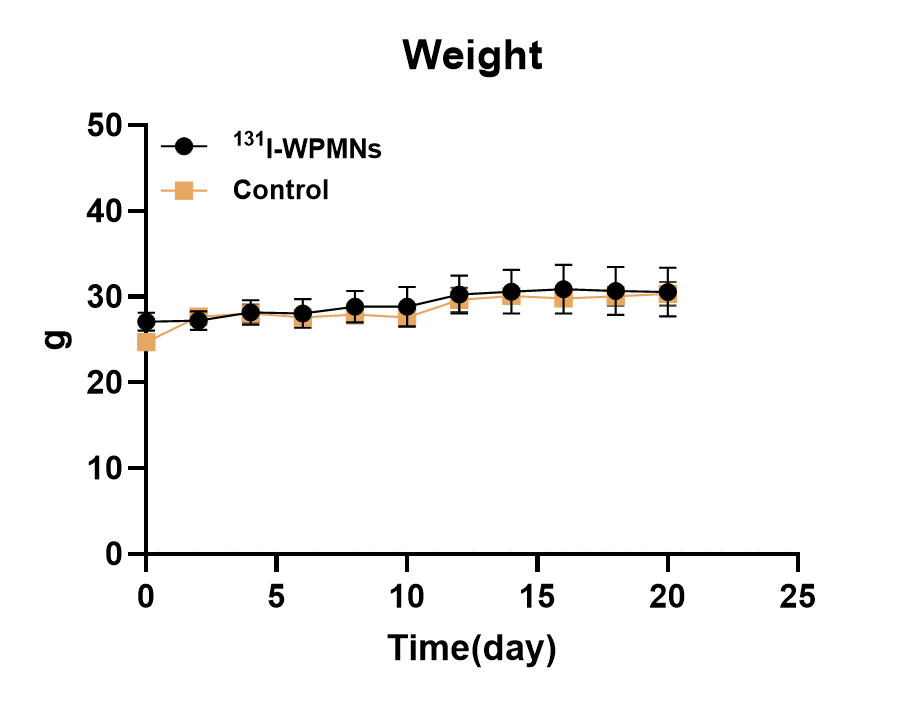


**Figure S7.** Changes in body weight of mice during toxicology experiments.


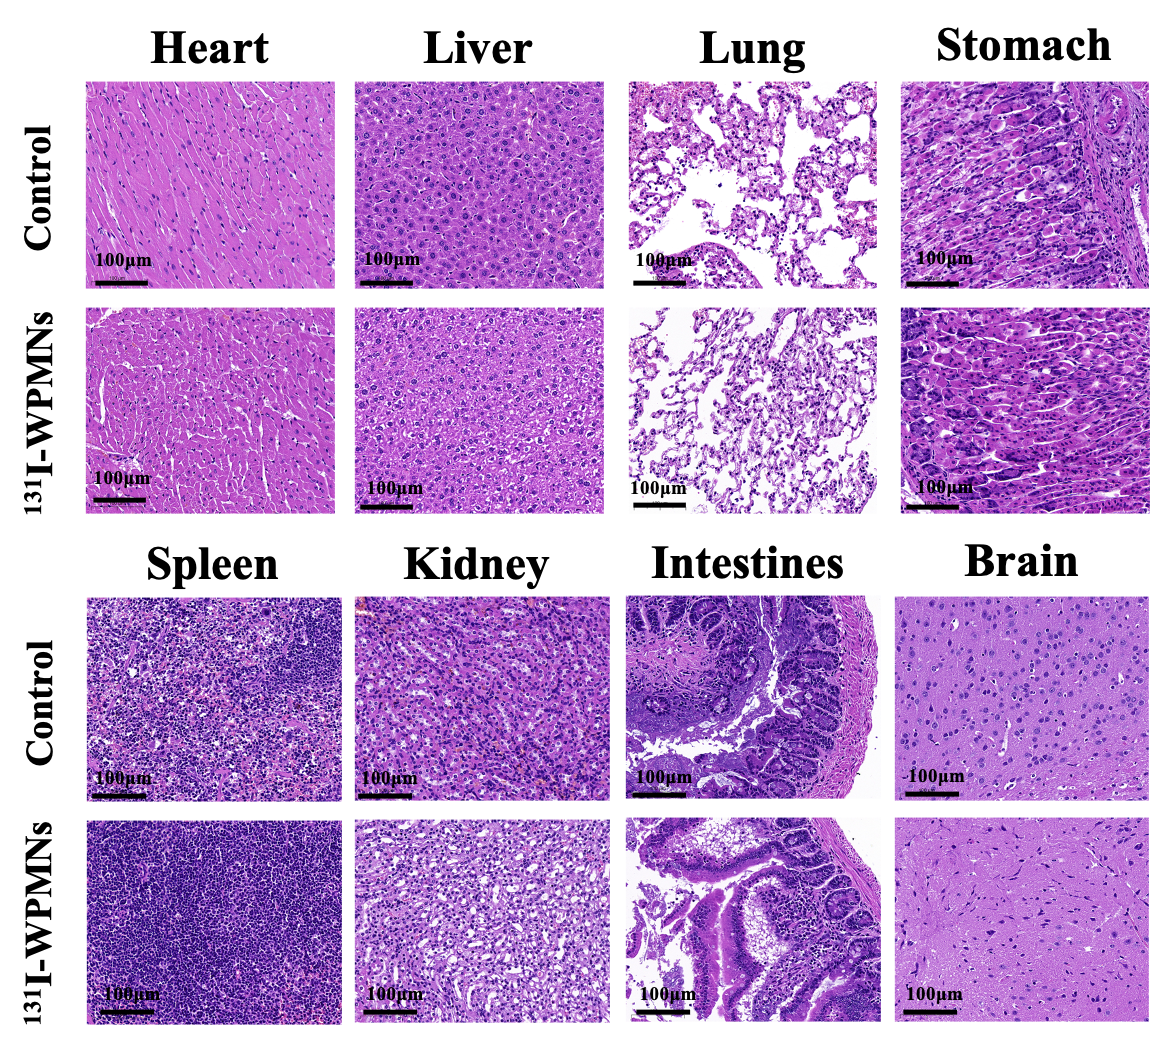


**Figure S8.** HE staining of important organs in mice during toxicology experiments.


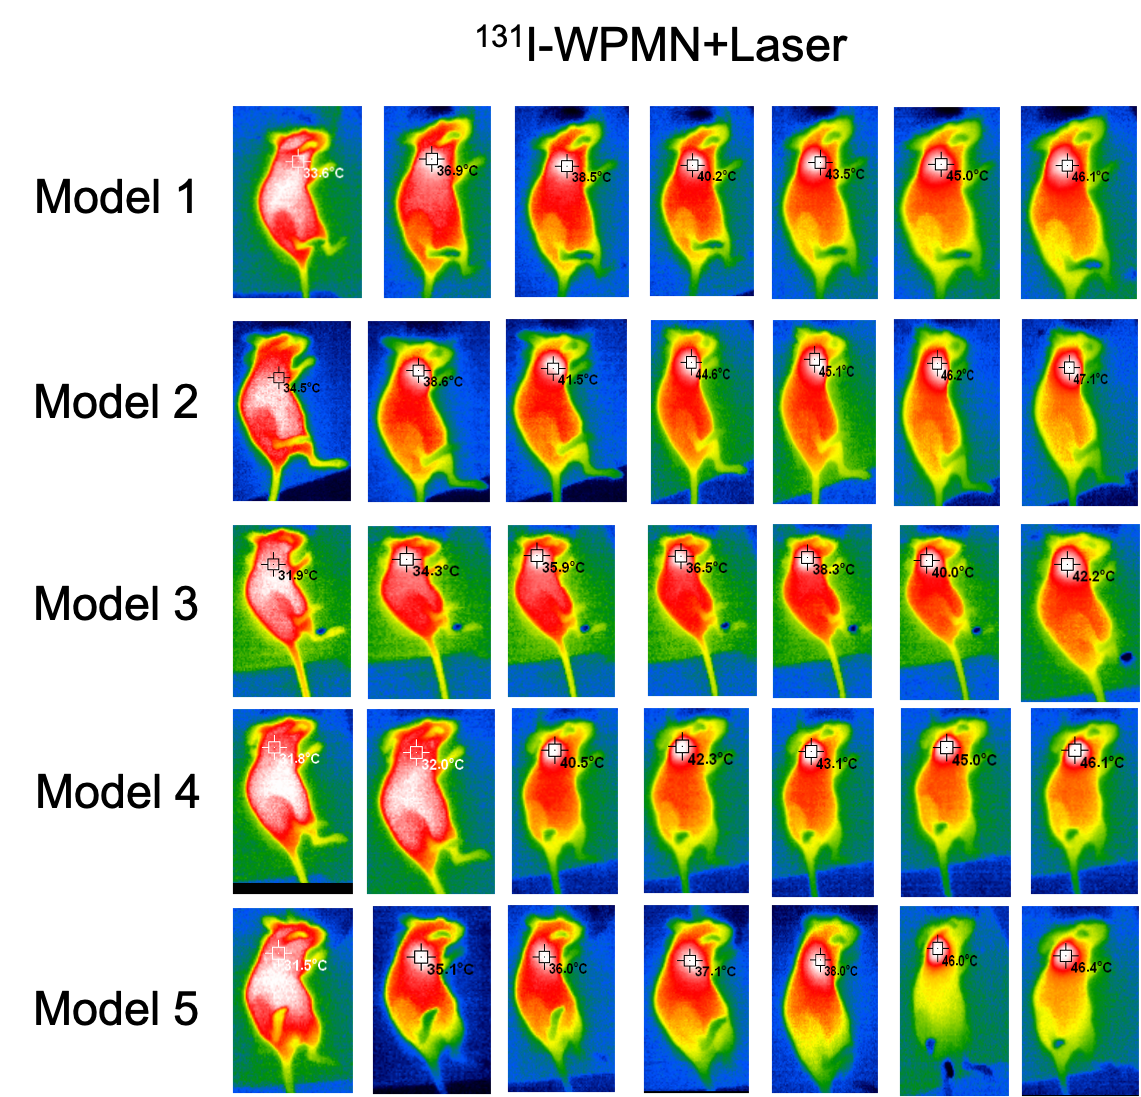


**Figure S9.** Infrared thermography during photothermal therapy in 5 mice treated in 131I-WPMN+Laser group.
